# Supplementary material for: Interdisciplinary Medication Adherence Program: The Example of a University Community Pharmacy in Switzerland
Source: Hindawi journal article supplement (doi:10.1155/2015/103546), 2015-01-01
Supplement: f1 [file 103546.f1.pdf]

### **Appendix 1: published research about the medication adherence program**

| Article                        | Aim of the study                                                                                                                                                                          | Studied population and study duration                                                                                             | Design                                                                                                                                                                                                                                                                                                     | Outcomes                                                                                        | Results                                                                                                                                                                                                                                                                                                                                                                                                                                                |
|--------------------------------|-------------------------------------------------------------------------------------------------------------------------------------------------------------------------------------------|-----------------------------------------------------------------------------------------------------------------------------------|------------------------------------------------------------------------------------------------------------------------------------------------------------------------------------------------------------------------------------------------------------------------------------------------------------|-------------------------------------------------------------------------------------------------|--------------------------------------------------------------------------------------------------------------------------------------------------------------------------------------------------------------------------------------------------------------------------------------------------------------------------------------------------------------------------------------------------------------------------------------------------------|
| Fallab-Stubi et al., 1998 [28] | Evaluate the usefulness of EMs, comparing with pill count method and urine test.                                                                                                          | Tuberculin positive patients treated with isoniazid<br><br>N = 30<br><br>Period: 6 months                                         | Prospective study:<br>Visits planned every 4 weeks + Combined intervention (physician and pharmacist) with non-adherent patients at 3 and 6 months.                                                                                                                                                        | - Medication adherence                                                                          | Adherence with EMs: 91.5 +- 18.6 %,<br>With pill count: 96.2 +- 15.2 %,<br>With urine test: 91.3 +- 22.2 %.<br>EMs appeared to be more reliable than the pill count and urine test, which tended to overestimate the overall adherence. Combined intervention enhanced adherence in non-adherent patients.                                                                                                                                             |
| Schneider et al., 1998 [29]    | Assess if on-line monitoring of medication adherence is feasible and acceptable to patients.                                                                                              | Patients with chronic uncomplicated diseases (diabetes, hypertension, hypercholesterolaemia)<br><br>N = 7<br><br>Period: 2 months | Open pilot study:<br>- 4-weeks running phases with EMs<br>- After 1 month: a modem connected to the pharmacy was installed on the patient's telephone line and EMs were installed on the modem every evening by the patient<br>- In the end of the study: patients completed a satisfaction questionnaire. | - Medication adherence                                                                          | Adherence > 95 % : 4 patients<br>Adherence < 95 %: 3 patients but adherence increased during the on-line monitoring period.<br><br>On-line monitoring seems to be feasible and acceptable to patients.                                                                                                                                                                                                                                                 |
| Schwed et al., 1999 [30]       | Determine adherence to lipid-lowering therapy, using an EMs vs. pill count. Illustrate pattern of non adherence. Evaluate the relationship between adherence and response to fluvastatin. | Hypercholesterolemia<br><br>N = 39<br><br>Period: 9 months                                                                        | Open label study:<br>- Dietetic phase: 3 months with 3 clinical visits<br>- Active treatment phase (fluvastatin): 6 months with 3 clinical visits (at 1, 3 and 6 months).                                                                                                                                  | - Medication adherence<br>- Pattern of non adherence<br>- Total cholesterol and LDL cholesterol | Lipid profile was improved during the active treatment phase but not during dietetic phase.<br><br>Adherence was > 80 % at each visit but decreased over time. Pill count overestimated adherence data.<br><br>Patterns of non adherence observed: drug holiday, missed doses, multiple daily doses, or toothbrush effect.<br><br>Correlation between rate of adherence and decrease in LDL cholesterol: significant with EMs but not with pill count. |

|                                    |                                                                                                                                                                                                                               |                                                                                                                       |                                                                                                                                                                                                                                                                |                                                                                                                          |                                                                                                                                                                                                                                                                                                                                                                                                                                        |
|------------------------------------|-------------------------------------------------------------------------------------------------------------------------------------------------------------------------------------------------------------------------------|-----------------------------------------------------------------------------------------------------------------------|----------------------------------------------------------------------------------------------------------------------------------------------------------------------------------------------------------------------------------------------------------------|--------------------------------------------------------------------------------------------------------------------------|----------------------------------------------------------------------------------------------------------------------------------------------------------------------------------------------------------------------------------------------------------------------------------------------------------------------------------------------------------------------------------------------------------------------------------------|
| <b>Bertholet et al., 2000 [31]</b> | Evaluate the effect of the use of EMs on identifying and correcting adherence problems and its ultimate effect on enhancing the clinical outcome                                                                              | Hypertensive patients (BP > 140/90 mm Hg)<br><br>N = 69<br><br>Period: no information                                 | Prospective study: Antihypertensive therapy dispensed in EMs.                                                                                                                                                                                                  | <ul style="list-style-type: none"> <li>- Medication adherence</li> <li>- Blood pressure</li> </ul>                       | Decrease of blood pressure (from 159/104 +/- 23/12 to 143/92 +/- 20/15 mm Hg) for the group but:<br>The use of electronic monitors had a positive effect on enhancing the therapy of antihypertensive patients.                                                                                                                                                                                                                        |
| <b>Burnier et al., 2001 [19]</b>   | Evaluate the potential benefits EMs in the management of patients with resistant hypertension.                                                                                                                                | Hypertensive patients resistant to a 3-drug regimen<br><br>N = 41<br><br>Period: 4 months                             | Prospective study: 2 months follow-up with EMs. After this period, patients could continue with EMs during 2 more months and treatment was adapted if necessary                                                                                                | <ul style="list-style-type: none"> <li>- Medication adherence</li> <li>- Blood pressure</li> </ul>                       | At 2 months: significant improvement of blood pressure. Patients with lowest adherence had higher diastolic blood pressure.<br>At 4 months (n=30/41): further significant decrease in blood pressure.                                                                                                                                                                                                                                  |
| <b>Schneider et al., 2003 [32]</b> | Evaluate the efficacy of a nicotine nasal spray in smoking cessation and characterize the pattern of use of the nasal spray with a special electronic monitor to assess factors associated with cessation success or failure. | Patient referred to the smoking cessation unit from October 1996 to April 1997<br><br>N = 92<br><br>Period: 24 months | Open prospective exploratory study: patients received a nicotine nasal spray with a microchip (MDILog) for 18 months.<br>Follow-up visits were scheduled at week 2 and at 1,2, 3, 4, 6, 9, 12, 15, 18, 21 and 24 months.                                       | <ul style="list-style-type: none"> <li>- Number of abstainers at 12 and 24 months</li> <li>- Use of the spray</li> </ul> | First 2 weeks: abstinence was significantly associated with cessation success at 6 and 24 months.<br><br>First month: median use of 12 puffs/day in abstainers and 6 puffs/day in failures. Abstainers used the spray less in the morning but more in the evening/night compared with failures.<br><br>Mean daily consumption of the nicotine nasal spray remained lower than expected in most participants, particularly in failures. |
| <b>Schneider et al., 2003 [33]</b> | Evaluate the benefit of an online telemonitoring of medication adherence.                                                                                                                                                     | Epileptic patients<br><br>N = 26 (12 in the intervention group)<br><br>Period: 8 months                               | Pilot randomized controlled study:<br><ul style="list-style-type: none"> <li>- Control: antiepileptic drugs in EMs</li> <li>- Intervention: EMs combined with online telemonitoring. The pharmacist called patients if adherence problems occurred.</li> </ul> | <ul style="list-style-type: none"> <li>- Medication adherence</li> </ul>                                                 | Percentage of days with correct dosing: > 90 % in control and intervention groups.<br><br>Number of interventions performed by pharmacists: 78 (4 patients had more than 10 interventions).<br><br>Intervention group: trend to fewer epileptic events vs. control.                                                                                                                                                                    |

|                                   |                                                                                                                                    |                                                                                                          |                                                                                                                                                                                                                                                                                                                                  |                                                                                                                                                       |                                                                                                                                                                                                                                                                                                                                                                                                                                                |
|-----------------------------------|------------------------------------------------------------------------------------------------------------------------------------|----------------------------------------------------------------------------------------------------------|----------------------------------------------------------------------------------------------------------------------------------------------------------------------------------------------------------------------------------------------------------------------------------------------------------------------------------|-------------------------------------------------------------------------------------------------------------------------------------------------------|------------------------------------------------------------------------------------------------------------------------------------------------------------------------------------------------------------------------------------------------------------------------------------------------------------------------------------------------------------------------------------------------------------------------------------------------|
| <b>Landry et al., 2006 [34]</b>   | Evaluate adherence to malaria chemoprophylaxis with weekly mefloquine.<br><br>Compare EMs adherence with usual care questionnaire. | Adult travellers to sub-Saharan Africa<br><br>N = 81<br><br>Period: March to April 1997                  | Before Travelling: oral and written information received about malaria and mefloquine + questionnaire on demographic and travel data, medical history and current medical treatment + patients received mefloquine in EMs.<br><br>After travelling: second questionnaire on protective measures, drug intake and adverse events. | <ul style="list-style-type: none"> <li>- Medication adherence</li> <li>- Demographics and Travel Characteristics</li> <li>- Adverse events</li> </ul> | <p>Electronic adherence data:</p> <ul style="list-style-type: none"> <li>- 75.3% took all tablets: 32.1% at the expected date, 9.9% starting late, 23.5% with intervals of <math>\pm 1</math> day from the right date and 9.9% took pills in a random way</li> <li>- 24.7% missed some doses mainly after return.</li> </ul> <p>Questionnaire: higher strict adherence data, some answers not reliable (21 cases with discordant results).</p> |
| <b>Santschi et al., 2007 [35]</b> | Evaluate the acceptability of a new electronic drug adherence monitor (IDAS II).                                                   | Hypertensive patients treated with irbesartan<br><br>N = 24<br><br>Period: 4 months                      | randomised two-way cross-over study:<br>Device 1, 2 months: IDAS II<br>Device 2, 2 months: MEMS                                                                                                                                                                                                                                  | <ul style="list-style-type: none"> <li>- Patient's opinion on both devices</li> <li>- Medication adherence</li> <li>- Blood pressure</li> </ul>       | <p>Both devices: reliable reminders</p> <p>Preferences: MEMS (10/24), IDAS II (11/24), no preference (3/24)</p> <p>MEMS: easier to use than IDAS II</p> <p>IDAS II: better packaging than MEMS</p> <p>Adherence: 99.2 % with both devices, higher regularity of drug intake timing with IDAS II.</p>                                                                                                                                           |
| <b>Santschi et al., 2008 [36]</b> | Investigate if having the possibility to use EMs with interdisciplinary networks improved blood pressure control.                  | Uncontrolled hypertensive patients<br><br>N = 68 (34 in the intervention group)<br><br>Period: 12 months | Pragmatic cluster randomised controlled study:<br>Intervention: medication adherence monitored with EMs<br>Control: usual care.                                                                                                                                                                                                  | <ul style="list-style-type: none"> <li>- Target office BP&lt;140/90 mmHg</li> </ul>                                                                   | Significantly more patients reached target BP in the intervention group at 4 and 12 months vs. control group.                                                                                                                                                                                                                                                                                                                                  |

|                                       |                                                                                  |                                                                                                                                                                                                            |                                                                                                                                                                                                                                  |                                                                                                                                                                                                                                                                                                                                                 |                                                                                                                                                                                                                                                                                                                                                                                                                                                                                                                                            |
|---------------------------------------|----------------------------------------------------------------------------------|------------------------------------------------------------------------------------------------------------------------------------------------------------------------------------------------------------|----------------------------------------------------------------------------------------------------------------------------------------------------------------------------------------------------------------------------------|-------------------------------------------------------------------------------------------------------------------------------------------------------------------------------------------------------------------------------------------------------------------------------------------------------------------------------------------------|--------------------------------------------------------------------------------------------------------------------------------------------------------------------------------------------------------------------------------------------------------------------------------------------------------------------------------------------------------------------------------------------------------------------------------------------------------------------------------------------------------------------------------------------|
| <b>Krummenacher et al., 2010 [20]</b> | Evaluate the feasibility of a comprehensive, interdisciplinary adherence program | <p>HIV patients followed by the Swiss HIV Cohort Study in 2 centres: Lausanne and Basel (Switzerland)</p> <p>N = 32 (21 in the intervention group)</p> <p>Period: 6 months, November 2006 to July 2007</p> | <p>Pilot study, quasi-experimental with 2 arms:</p> <ul style="list-style-type: none"> <li>- intervention: usual care + EMs + motivational interviews with a pharmacist.</li> <li>- control: usual care + blinded EMs</li> </ul> | <ul style="list-style-type: none"> <li>- Rate of patients' acceptance to take part in the program</li> <li>- Rate of patients' retention in intervention and control groups</li> <li>- Adherence, implementation and persistence</li> </ul>                                                                                                     | <p>Study was not feasible in Basel: the recruitment stopped because unsuccessful inclusion. But feasible in Lausanne:</p> <ul style="list-style-type: none"> <li>- Inclusion rate intervention vs. control: 84% vs 52 %</li> <li>- Retention rate: 91% vs 82%</li> <li>- Adherence: 93% vs 87% but adherence decreased more quickly in the control group</li> <li>- Implementation: 97% vs 95% and decrease with time in both groups</li> <li>- Persistence: 97% vs 81%.</li> </ul>                                                        |
| <b>Krummenacher et al., 2011 [21]</b> | Analyze the interdisciplinary HIV-adherence program                              | <p>HIV patients referred to the program</p> <p>N = 104</p> <p>Period: August 2004 to April 2008</p>                                                                                                        | Retrospective cohort study                                                                                                                                                                                                       | <ul style="list-style-type: none"> <li>- Socio-demographic data</li> <li>- Reasons for inclusion</li> <li>- Adherence rate</li> <li>- Clinical data (VL and CD4 cells)</li> <li>- Description of the pharmacy visits</li> <li>- Reasons for antiretroviral treatment adjustments</li> <li>- Reasons for interruption of the program.</li> </ul> | <p>59% women, 42% black ethnicity and median age = 39. 77% patients were ART-experienced and 59% had a protease inhibitor.</p> <p>Retention rate in the program: 92%</p> <p>Reasons for inclusion: naive patients, non adherence or suboptimal clinical outcomes</p> <p>Adherence: 87% persistence and 88% implementation. Number of undetectable patients increased during the study.</p> <p>Median time of interview: 35 minutes</p> <p>ART Adjustments: 45% (41% treatment simplification, 20% adverse events, 20% clinical issues)</p> |

|                                       |                                                                                                                                                 |                                                                                                                                                                                                |                                                                                                                                       |                                                                                                                       |                                                                                                                                                                                                                                                                                                                                                                                                                                                                                                                                                                                                        |
|---------------------------------------|-------------------------------------------------------------------------------------------------------------------------------------------------|------------------------------------------------------------------------------------------------------------------------------------------------------------------------------------------------|---------------------------------------------------------------------------------------------------------------------------------------|-----------------------------------------------------------------------------------------------------------------------|--------------------------------------------------------------------------------------------------------------------------------------------------------------------------------------------------------------------------------------------------------------------------------------------------------------------------------------------------------------------------------------------------------------------------------------------------------------------------------------------------------------------------------------------------------------------------------------------------------|
| <b>Krummenacher et al., 2012 [22]</b> | Describe demographic and clinical characteristics of HIV patients referred to the adherence program in comparison to the entire HIV population. | <p>HIV patients referred to the adherence program<br/>N = 73</p> <p>HIV patients followed in the same infection disease department<br/>N = 494</p> <p>Period: August 2007 to November 2007</p> | Retrospective descriptive cross-sectional study                                                                                       | <ul style="list-style-type: none"> <li>- Socio-demographic data</li> <li>- Clinical data: VL and CD4 cells</li> </ul> | <p>Subjects referred to the adherence program differed from the entire HIV population:</p> <ul style="list-style-type: none"> <li>- Women more often included (66%)</li> <li>- Protease inhibitor more often prescribed than NNRTI</li> <li>- Lower CD4 cell count</li> <li>- Patients more often under salvage therapy.</li> </ul>                                                                                                                                                                                                                                                                    |
| <b>Gertsch et al., 2013 [24]</b>      | Describe adherence of pregnancy and postpartum HIV women referred to the adherence program.                                                     | <p>Pregnant HIV women referred to the adherence program</p> <p>N = 25</p> <p>Period: 2004 to 2012</p>                                                                                          | Exploratory, retrospective study                                                                                                      | <ul style="list-style-type: none"> <li>- Socio-demographic data</li> <li>- Adherence data</li> </ul>                  | <p>68% black ethnicity, 44% naive patients, median age= 29</p> <p>96% has a protease inhibitor and NRTIs</p> <p>Women who stopped the program:</p> <ul style="list-style-type: none"> <li>- 24% during pregnancy, 12% at childbirth and 16% during postpartum period</li> <li>- 62% kept on ART, 3 stopped ART after childbirth and 2 stopped without physician's agreement</li> </ul> <p>Unattended visits: increased from 17% during pregnancy to 38% during postpartum</p> <p>Probability of correct ART intake: 97% during pregnancy, 93% at childbirth and increased again during postpartum.</p> |
| <b>Krummenacher et al., 2014 [23]</b> | Identify barriers and facilitators encountered by HIV patients with suboptimal medication adherence.                                            | <p>HIV patients referred to the adherence program</p> <p>N = 17</p> <p>Period: August 2004 to May 2008</p>                                                                                     | Retrospective, qualitative, thematic content analysis of pharmacists' notes during interviews conducted within the adherence program. | <ul style="list-style-type: none"> <li>- Barriers and facilitators</li> </ul>                                         | <p>Three main categories of barriers/facilitators:</p> <ul style="list-style-type: none"> <li>- Cognitive, emotional and motivational</li> <li>- Environmental, organisational and social</li> <li>- Treatment and disease.</li> </ul>                                                                                                                                                                                                                                                                                                                                                                 |

## References

- [1] World Health Organization, *Adherence to Long-Term Therapies—Evidence for Action*, 2003, [http://www.who.int/chp/knowledge/publications/adherence\\_report/en/](http://www.who.int/chp/knowledge/publications/adherence_report/en/).
- [2] B. Vrijens, S. De Geest, D. A. Hughes et al., “A new taxonomy for describing and defining adherence to medications,” *British Journal of Clinical Pharmacology*, vol. 73, no. 5, pp. 691–705, 2012.
- [3] C. Ortego, T. B. Huedo-Medina, J. Llorca et al., “Adherence to highly active antiretroviral therapy (HAART): a meta-analysis,” *AIDS and Behavior*, vol. 15, no. 7, pp. 1381–1396, 2011.
- [4] L. A. Jeanneret, F. Lüthi, M. P. Schneider, S. Troxler, and O. Bugnon, “Adhésion thérapeutique aux traitements oncologiques oraux et prise en charge interdisciplinaire,” *Revue Médicale Suisse*, vol. 7, no. 296, pp. 1154–1160, 2011.
- [5] R. Nieuwlaat, W. Wilczynski, T. Navarro et al., “Interventions for enhancing medication adherence,” *The Cochrane Database of Systematic Reviews*, vol. 11, Article ID CD000011, 2014.
- [6] IMS Institute for Healthcare Informatics, “Advancing the responsible use of medicines—applying levers for change—summary,” p. 1–24, 2012, <http://www.imshealth.com/portal/site/imshealth/menuitem.762a961826aad98f53c753c71ad8c22a/?vgnextoid=faf9ee0a8e631410VgnVCM10000076192ca2RCRD&vgnextchannel=736de5fda6370410VgnVCM10000076192ca2RCRD&vgnextfmt=default>.
- [7] O. Bugnon and M. Buchmann, “Pharmacie d’officine et médecine interne générale à la croisée des mêmes chemins: des opportunités à saisir,” *Revue Médicale Suisse*, vol. 8, no. 364, pp. 2287–2291, 2012.
- [8] M.-P. Schneider and P. Aslanio, “Adherence policy, education and practice—an international perspective,” *Pharmacy Practice*, vol. 8, no. 4, pp. 209–212, 2010.
- [9] D. Drotar, “Strategies of adherence promotion in the management of pediatric chronic conditions,” *Journal of Developmental and Behavioral Pediatrics*, vol. 34, no. 9, pp. 716–729, 2013.
- [10] Association Pharmaceutique Belge (APB), “Entretien d’accompagnement de nouvelle médication—L’ENM: un train à ne pas manquer,” *Annales Pharmaceutiques Belges*, vol. 9, 2013.
- [11] K. M. Wells, T. Thornley, M. J. Boyd, and H. F. Boardman, “Views and experiences of community pharmacists and superintendent pharmacists regarding the New Medicine Service in England prior to implementation,” *Research in Social and Administrative Pharmacy*, vol. 10, no. 1, pp. 58–71, 2014.
- [12] NICE, “Guidelines CG76,” 2009, <http://www.nice.org.uk/guidance/cg76/resources>.
- [13] J. Demonceau, T. Ruppert, P. Kristanto et al., “Identification and assessment of adherence-enhancing interventions in studies assessing medication adherence through electronically compiled drug dosing histories: a systematic literature review and meta-analysis,” *Drugs*, vol. 73, no. 6, pp. 545–562, 2013.
- [14] <http://www.medamigo.com>.
- [15] <https://www.sispha.com/>.
- [16] J. D. Fisher, W. A. Fisher, K. R. Amico, and J. J. Harman, “An information-motivation-behavioral skills model of adherence to antiretroviral therapy,” *Health Psychology*, vol. 25, no. 4, pp. 462–473, 2006.
- [17] J.-B. Daeppen, C. Fortini, N. Bertholet et al., “Training medical students to conduct motivational interviewing: a randomized controlled trial,” *Patient Education and Counseling*, vol. 87, no. 3, pp. 313–318, 2012.
- [18] O. Bugnon, D. Hugentobler-Hampai, J. Berger, and M. P. Schneider, “New roles for community pharmacists in modern health care systems: a challenge for pharmacy education and research,” *Chimia*, vol. 66, no. 5, pp. 304–307, 2012.
- [19] M. Burnier, M. P. Schneider, A. Chiolerio, C. L. F. Stubi, and H. R. Brunner, “Electronic compliance monitoring in resistant hypertension: the basis for rational therapeutic decisions,” *Journal of Hypertension*, vol. 19, no. 2, pp. 335–341, 2001.
- [20] I. Krummenacher, M. Cavassini, O. Bugnon, R. Spirig, and M. P. Schneider, “Antiretroviral adherence program in HIV patients: a feasibility study in the Swiss HIV Cohort Study,” *Pharmacy World and Science*, vol. 32, no. 6, pp. 776–786, 2010.
- [21] I. Krummenacher, M. Cavassini, O. Bugnon, and M. P. Schneider, “An interdisciplinary HIV-adherence program combining motivational interviewing and electronic antiretroviral drug monitoring,” *AIDS Care*, vol. 23, no. 5, pp. 550–561, 2011.
- [22] I. Krummenacher, M. Cavassini, O. Bugnon, and M. P. Schneider, “Characteristics of HIV patients referred to a medication adherence program in Switzerland,” *International Journal of Clinical Pharmacy*, vol. 34, no. 3, pp. 426–431, 2012.
- [23] I. Krummenacher, B. Spencer, S. Du Pasquier, O. Bugnon, M. Cavassini, and M. P. Schneider, “Qualitative analysis of barriers and facilitators encountered by HIV patients in an ART adherence programme,” *International Journal of Clinical Pharmacy*, vol. 36, no. 4, pp. 716–724, 2014.
- [24] A. Gertsch, O. Michel, I. Locatelli et al., “Adherence to antiretroviral treatment decreases during postpartum compared to pregnancy: a longitudinal electronic monitoring study,” *AIDS Patient Care and STDs*, vol. 27, no. 4, pp. 208–210, 2013.
- [25] WHPA, “World’s health professions call for new emphasis on working together,” 2013, [http://www.whpa.org/WHPA\\_Statement\\_collaborative\\_practice.pdf](http://www.whpa.org/WHPA_Statement_collaborative_practice.pdf).
- [26] S. Michie, M. Richardson, M. Johnston et al., “The behavior change technique taxonomy (v1) of 93 hierarchically clustered techniques: building an international consensus for the reporting of behavior change interventions,” *Annals of Behavioral Medicine*, vol. 46, no. 1, pp. 81–95, 2013.
- [27] E. Guignard and O. Bugnon, “Pharmaceutical care in community pharmacies: practice and research in Switzerland,” *The Annals of Pharmacotherapy*, vol. 40, no. 3, pp. 512–517, 2006.
- [28] C.-L. Fallab-Stubi, J. P. Zellweger, A. Sauty, C. Uldry, D. Iorillo, and M. Burnier, “Electronic monitoring of adherence to treatment in the preventive chemotherapy of tuberculosis,” *International Journal of Tuberculosis and Lung Disease*, vol. 2, no. 7, pp. 525–530, 1998.
- [29] M.-P. Schneider and M. Burnier, “On-line home monitoring of drug compliance: is it feasible?” *European Journal of Clinical Pharmacology*, vol. 54, no. 6, pp. 489–490, 1998.
- [30] A. Schwed, C.-L. Fallab, M. Burnier et al., “Electronic monitoring of compliance to lipid-lowering therapy in clinical practice,” *Journal of Clinical Pharmacology*, vol. 39, no. 4, pp. 402–409, 1999.
- [31] N. Bertholet, B. Favrat, C. L. Fallab-Stubi, H. R. Brunner, and M. Burnier, “Why objective monitoring of compliance is important in the management of hypertension,” *The Journal of Clinical Hypertension*, vol. 2, no. 4, pp. 258–262, 2000.
- [32] M.-P. Schneider, G. van Melle, C. Uldry et al., “Electronic monitoring of long-term use of the nicotine nasal spray and predictors of success in a smoking cessation program,” *Nicotine and Tobacco Research*, vol. 5, no. 5, pp. 719–727, 2003.
- [33] M. P. Schneider, P. A. Despland, T. Buclin, and M. Burnier, “Evaluation of online telemonitoring of drug adherence: a pilot

randomised, controlled study in patients with epilepsy,” *The Journal on Information Technology in Healthcare*, vol. 1, no. 6, pp. 419–435, 2003.

- [34] P. Landry, D. Iorillo, R. Darioli, M. Burnier, and B. Genton, “Do travelers really take their mefloquine malaria chemoprophylaxis? Estimation of adherence by an electronic pillbox,” *Journal of Travel Medicine*, vol. 13, no. 1, pp. 8–14, 2006.
- [35] V. Santschi, G. Wuerzner, M.-P. Schneider, O. Bugnon, and M. Burnier, “Clinical evaluation of IDAS II, a new electronic device enabling drug adherence monitoring,” *European Journal of Clinical Pharmacology*, vol. 63, no. 12, pp. 1179–1184, 2007.
- [36] V. Santschi, N. Rodondi, O. Bugnon, and M. Burnier, “Impact of electronic monitoring of drug adherence on blood pressure control in primary care: a cluster 12-month randomised controlled study,” *European Journal of Internal Medicine*, vol. 19, no. 6, pp. 427–434, 2008.
